# Supplementary material for: Unveiling the role of cobalt doping in optimizing ammonia electrosynthesis on iron–cobalt oxyhydroxide hollow nanocages
Source: Royal Society of Chemistry journal article supplement (doi:10.1039/d3ta02403b), 2023-01-01
Supplement: d3ta02403b1.pdf [file d3ta02403b1.pdf]

**1 Supporting Information**

**2 Unveiling the role of cobalt doping for optimizing ammonia**

**3 electrosynthesis on iron-cobalt oxyhydroxide hollow nanocages**

**4** Xinxin Han<sup>a</sup>, Cheng Liu<sup>b</sup>, Yuan Tang<sup>a</sup>, Qiangguo Meng<sup>c</sup>, Weizhen Zhou<sup>c</sup>, Shixia  
**5** Chen<sup>\*,c</sup>, Shuguang Deng<sup>d</sup>, Jun Wang<sup>\*,c</sup>

**6**

**7** <sup>a</sup> School of Resources & Environment, Nanchang University, Nanchang 330031,

**8** People's Republic of China

**9** <sup>b</sup> School of Future Technology, Nanchang University, Nanchang 330031, People's

**10** Republic of China

**11** <sup>c</sup> School of Chemistry and Chemical Engineering, Nanchang University, Nanchang

**12** 330031, People's Republic of China

**13** <sup>d</sup> School for Engineering of Matter, Transport and Energy, Arizona State University,

**14** Tempe, AZ 85287, United States

**15**

**16**

**17**

|          |                                                                                                                             |          |
|----------|-----------------------------------------------------------------------------------------------------------------------------|----------|
| <b>1</b> | <b>Content</b>                                                                                                              |          |
| 2        | Supporting Information .....                                                                                                | 1        |
| <b>3</b> | <b>1. Experimental details:.....</b>                                                                                        | <b>5</b> |
| 4        | 1. 1 Synthesis of Cu <sub>2</sub> O nanocubes. ....                                                                         | 5        |
| 5        | 1.2 Synthesis of FeCoOOH HNCs hollow nanocubes. ....                                                                        | 5        |
| 6        | 1.3 Catalyst characterization.....                                                                                          | 6        |
| 7        | 1.4 Nitrogen purification .....                                                                                             | 6        |
| 8        | 1.5 Electrochemical measurements. ....                                                                                      | 6        |
| 9        | 1.6 Determination of NH <sub>3</sub> .....                                                                                  | 8        |
| 10       | 1.7 Determination of N <sub>2</sub> H <sub>4</sub> .....                                                                    | 8        |
| 11       | 1.8 Determination of NO <sub>x</sub> . ....                                                                                 | 9        |
| 12       | 1.9 <sup>15</sup> N isotopic labeling experiment. ....                                                                      | 9        |
| 13       | 1.10 Calculations of NH <sub>3</sub> yield rate and Faradaic efficiency. ....                                               | 10       |
| 14       | Figure S1. The SEM image of (a) FeCoOOH HNCs, (b) FeCoOOH HNCs-L, and (c)                                                   |          |
| 15       | FeCoOOH HNCs-H.....                                                                                                         | 11       |
| 16       | Figure S2. PXRD patterns of the β-FeOOH, FeCoOOH HNCs, FeCoOOH HNCs-H and                                                   |          |
| 17       | FeCoOOH HNCs-L samples. ....                                                                                                | 12       |
| 18       | Figure S3. Wide XPS survey spectrum for (a) FeCoOOH HNCs-L, (b) FeCoOOH HNCs,                                               |          |
| 19       | and (c) FeCoOOH HNCs-H.....                                                                                                 | 13       |
| 20       | Figure S4. N <sub>2</sub> adsorption-desorption isotherms of the FeCoOOH HNCs, FeCoOOH HNCs-                                |          |
| 21       | H, and FeCoOOH HNCs-L at 77 K.....                                                                                          | 14       |
| 22       | Figure S5. (a) UV-Vis absorption spectra of indophenol assays with NH <sub>3</sub> in 0.1 M Na <sub>2</sub> SO <sub>4</sub> |          |
| 23       | after standing in darkness for 2 h at room temperature; (b) Calibration curve used for                                      |          |
| 24       | calculation of NH <sub>3</sub> concentration. ....                                                                          | 15       |
| 25       | Figure S6. (a) UV-Vis absorption spectra of various N <sub>2</sub> H <sub>4</sub> ·H <sub>2</sub> O concentrations after    |          |
| 26       | incubation for 15 min at room temperature; (b) Calibration curve used for calculation of                                    |          |
| 27       | N <sub>2</sub> H <sub>4</sub> concentration. ....                                                                           | 16       |
| 28       | Figure S7. (a) UV-Vis absorption spectra of various NO <sub>x</sub> concentrations after standing in                        |          |
| 29       | darkness for 15 min at room temperature; (b) Calibration curve used for calculation of NO <sub>x</sub>                      |          |
| 30       | concentration.....                                                                                                          | 17       |
| 31       | Figure S8. UV-Vis absorption spectra of the electrolytes stained with indicator after                                       |          |
| 32       | electrolysis at different potentials under N <sub>2</sub> atmosphere for 2 h by using the Watt and                          |          |
| 33       | Chrisp method.....                                                                                                          | 18       |

|    |                                                                                                                                       |    |
|----|---------------------------------------------------------------------------------------------------------------------------------------|----|
| 1  | Figure S9. UV-Vis absorption spectra of the electrolytes stained with indicator after                                                 |    |
| 2  | electrolysis at different potentials under N <sub>2</sub> atmosphere for 2 h by using N-(-1-naphthyl)                                 |    |
| 3  | ethylenediamine dihydrochloride spectrophotometric method. ....                                                                       | 19 |
| 4  | Figure S10. Chronoamperometry results for the FeCoOOH HNCs at different potentials for                                                |    |
| 5  | 2 h. ....                                                                                                                             | 20 |
| 6  | Figure S11. Chronoamperometry results for the FeCoOOH HNCs-H at different potentials                                                  |    |
| 7  | for 2 h. ....                                                                                                                         | 21 |
| 8  | Figure S12. Chronoamperometry results for the FeCoOOH HNCs-L at different potentials                                                  |    |
| 9  | for 2 h. ....                                                                                                                         | 22 |
| 10 | Figure S13. UV-Vis absorption spectra of the electrolytes stained with indophenol indicator                                           |    |
| 11 | after NRR electrolysis by FeCoOOH HNCs catalyst at different potentials for 2 h. ....                                                 | 23 |
| 12 | Figure S14. UV-Vis absorption spectra of the electrolytes stained with indophenol indicator                                           |    |
| 13 | after NRR electrolysis by FeCoOOH HNCs-H catalyst at different potentials for 2 h. ....                                               | 24 |
| 14 | Figure S15. UV-Vis absorption spectra of the electrolytes stained with indophenol indicator                                           |    |
| 15 | after NRR electrolysis by FeCoOOH HNCs-L catalyst at different potentials for 2 h. ....                                               | 25 |
| 16 | Figure S16. NH <sub>3</sub> yield rate and FE for FeCoOOH HNCs-H catalyst at different potentials                                     |    |
| 17 | for 2 h NRR measurement. ....                                                                                                         | 26 |
| 18 | Figure S17. NH <sub>3</sub> yield rate and FE for FeCoOOH HNCs-L catalyst at different potentials                                     |    |
| 19 | for 2 h NRR measurement. ....                                                                                                         | 27 |
| 20 | Figure S18. NH <sub>3</sub> yield rate and FE for β-FeOOH catalyst at different potentials for 2 h                                    |    |
| 21 | NRR measurement. ....                                                                                                                 | 28 |
| 22 | Figure S19. (a) The chronoamperometry assessment and (b) the UV-Vis absorption spectra                                                |    |
| 23 | of FeCoOOH HNCs catalyst electrolyzed at -0.3 V for 5 cycles. ....                                                                    | 29 |
| 24 | Figure S20. (a) The quantity of NH <sub>3</sub> with various electrolysis times and (b) NH <sub>3</sub> FE at                         |    |
| 25 | various electrolysis times using FeCoOOH HNCs at -0.3 V. ....                                                                         | 30 |
| 26 | Figure S21. XRD patterns of FeCoOOH HNCs catalyst after long-term NRR test. ....                                                      | 31 |
| 27 | Figure S22. TEM image of FeCoOOH HNCs catalyst after long-term NRR test. ....                                                         | 32 |
| 28 | Figure S23. UV-vis absorption spectra of different samples in control experiments to                                                  |    |
| 29 | eliminate possible environmental influence. ....                                                                                      | 33 |
| 30 | Figure S24. (a) The <sup>1</sup> H NMR (400 MHz) spectra of a series of <sup>14</sup> NH <sub>4</sub> <sup>+</sup> standard solutions |    |
| 31 | with known concentrations and the FeCoOOH HNCs catalyst produced <sup>14</sup> NH <sub>4</sub> <sup>+</sup> . Maleic                  |    |
| 32 | acid (MA) is used as the internal standard; (b) the corresponding calibration curve is used                                           |    |
| 33 | for the calculation of NH <sub>4</sub> <sup>+</sup> concentration. ....                                                               | 34 |
| 34 | Figure S25. (a) The <sup>1</sup> H NMR (400 MHz) spectra of a series of <sup>15</sup> NH <sub>4</sub> <sup>+</sup> standard solutions |    |
| 35 | with known concentrations and the FeCoOOH HNCs catalyst produced <sup>15</sup> NH <sub>4</sub> <sup>+</sup> . Maleic                  |    |

|    |                                                                                                                           |           |
|----|---------------------------------------------------------------------------------------------------------------------------|-----------|
| 1  | acid (MA) is used as the internal stand; (b) The corresponding calibration curve is used for                              |           |
| 2  | the calculation of $\text{NH}_4^+$ concentration.....                                                                     | 36        |
| 3  | Figure S26. (a-c) Cyclic voltammetry curves of $\text{Fe}_x\text{Co}_x\text{OOH}$ HNCs (1:1, 1:2, and 2:1) at             |           |
| 4  | various scan rates ( $20 \text{ mV s}^{-1}$ to $100 \text{ mV s}^{-1}$ ); (d) Current density vs scan rate of as-prepared |           |
| 5  | samples and the corresponding linear slopes.....                                                                          | 37        |
| 6  | Figure S27. The free energy landscapes and optimized structures of various intermediates                                  |           |
| 7  | along the reaction path on $\text{FeCoOOH}$ HNCs-H reaction unites. ....                                                  | 38        |
| 8  | Figure S28. The free energy landscapes and optimized structures of various intermediates                                  |           |
| 9  | along the reaction path on $\text{FeCoOOH}$ HNCs-L reaction unites. ....                                                  | 39        |
| 10 | Figure S29. Charge density difference image of $^*\text{N}_2$ absorbed on $\text{FeCoOOH}$ HNCs-L                         |           |
| 11 | surface.....                                                                                                              | 40        |
| 12 | Figure S30. Charge density difference image of $^*\text{N}_2$ absorbed on $\text{FeCoOOH}$ HNCs-H                         |           |
| 13 | surface.....                                                                                                              | 41        |
| 14 | Figure S31. Bader charges for $\text{N}_2$ of $\text{FeCoOOH}$ HNCs-L, $\text{FeCoOOH}$ HNCs and                          |           |
| 15 | $\text{FeCoOOH}$ HNCs-H.....                                                                                              | 42        |
| 16 | Figure S32. The free energy landscapes and optimized structures of various intermediates                                  |           |
| 17 | along the reaction path on $\text{FeCoOOH}$ HNCs-L reaction unites. ....                                                  | 43        |
| 18 | Figure S33. The free energy landscapes and optimized structures of various intermediates                                  |           |
| 19 | along the reaction path on $\text{FeCoOOH}$ HNCs-L reaction unites. ....                                                  | 44        |
| 20 | Figure S34. PDOS of the three reaction sites; the Fermi level is set as the energy zero point.                            |           |
| 21 | .....                                                                                                                     | 45        |
| 22 | <b>3. Tables .....</b>                                                                                                    | <b>46</b> |
| 23 | Table S1. ICP results of the $\text{FeCoOOH}$ HNCs.....                                                                   | 46        |
| 24 | Table S2. The comparable table of state-of-the-art NRR catalysts. ....                                                    | 47        |
| 25 |                                                                                                                           |           |
| 26 |                                                                                                                           |           |
| 27 |                                                                                                                           |           |

## 1 1. Experimental details:

### 2 1.1 Synthesis of Cu<sub>2</sub>O nanocubes.

3 In a typical procedure, 0.75 g CuSO<sub>4</sub>·5H<sub>2</sub>O and 0.294 g sodium citrate were  
4 dissolved in 160 mL of deionized water with stirring to form a uniform dispersion.  
5 Then, 2 g of NaOH were added to the above solution. Afterwards, 100 mL of 0.03 M  
6 ascorbic acid was added to the suspension while stirring for 45 minutes. The resulting  
7 mixed solution was aged at room temperature for 1 hour. The precipitate was collected  
8 by centrifugation, washed with water and ethanol several times, and then dried in a  
9 vacuum at 60 °C overnight.

### 10 1.2 Synthesis of FeCoOOH HNCs nanocubes.

11 The FeCoOOH HNCs with hollow nanocubic structures were prepared according to  
12 Pearson's principle by employing Cu<sub>2</sub>O nanocubes as starting templates. Specifically,  
13 200 mg of the as-prepared Cu<sub>2</sub>O was completely dispersed into a 400 mL mixed solvent  
14 of H<sub>2</sub>O and ethanol (v/v = 1/1). Then, 13.2 g of PVP (polyvinyl pyrrolidone, Mw =  
15 40000) was dissolved in the solution by ultrasonic treatment for 15 minutes.  
16 Subsequently, 100 mg of FeCl<sub>3</sub>·6H<sub>2</sub>O and CoCl<sub>2</sub>·6H<sub>2</sub>O with different molar ratios (1/1,  
17 1/2, and 2/1) were dissolved in this system. After magnetic stirring for 30 minutes,  
18 Na<sub>2</sub>S<sub>2</sub>O<sub>3</sub> solution (160 mL, 1 M) was added dropwise into the above mixture while  
19 stirring for another 60 minutes. After centrifugation, washing with deionized water and  
20 ethanol, and drying in a vacuum at 60 °C for 12 hours, the resulting products were  
21 named FeCoOOH HNCs (1/1), FeCoOOH HNCs-H (1/2), and FeCoOOH HNCs-L  
22 (2/1).

### 1 1.3 Catalyst characterization.

2 The scanning electron microscopy (SEM) images were obtained using a field emission  
3 scanning electron microscopy (FESEM, Hitachi SU8010, Japan). The transmission  
4 electron microscopy (TEM) images were collected using a high-resolution TEM  
5 (HRTEM, FEI HELIOS NanoLab 600i Titan G2 60-300) and a high-angle annular  
6 dark-field scanning TEM (HAADF-STEM, Esprit Super X, Bruker). X-ray  
7 photoelectron spectroscopy (XPS) measurements were performed on an ESCALAB  
8 250Xi. Powder X-ray diffraction (XRD) patterns were acquired using a Bruker D8  
9 Advance X-ray diffractometer with a Cu K $\alpha$  radiation ( $\lambda=1.5406 \text{ \AA}$ ). The Raman  
10 spectra were detected using a Confocal LabRam HR800 spectrometer with 532 nm  
11 radiation (HORIBA Jobin Yvon). The textural properties were characterized in a  
12 Micromeritics ASAP 2460 apparatus by N<sub>2</sub> adsorption-desorption isotherms at 77 K.  
13 UV-Vis measurements were performed using a UV-Vis spectrophotometer (TU-1900,  
14 PERSEE). The hydrophobic properties were measured by the Sindatek 100P contact  
15 angle goniometer.

### 16 1.4 Nitrogen purification

17 The high purity <sup>14</sup>N<sub>2</sub> and <sup>15</sup>N<sub>2</sub> (Enrichment: 99 atom% <sup>15</sup>N) flowed through acid and  
18 alkaline solution traps successively to remove the possible NH<sub>3</sub> and NO<sub>x</sub>. The purified  
19 gas was then passed through a drying tube to prevent vapor before being supplied into  
20 the cathodic compartment. The electrolyte obtained from this process was analyzed  
21 using spectrophotometric methods to ensure that no NH<sub>3</sub> or NO<sub>x</sub> were present.

## 1 1.5 Electrochemical measurements.

2 The electrochemical measurements were performed in a gas-tight H-type cell with  
3 three-electrode separated by a proton-exchange membrane (DuPont, Nafion 212).  
4 Before testing, the Nafion 212 membrane was pretreated by heating in a 0.5 M H<sub>2</sub>SO<sub>4</sub>  
5 and 3 wt% H<sub>2</sub>O<sub>2</sub> solution at 80 °C for 1 hour each, respectively and then putting it into  
6 ultrapure water at 80 °C for 12 hours. The H-shaped electrochemical cell was also put  
7 into ultrapure water at 80 °C for 12 hours. All of the NRR electrochemical  
8 measurements were performed with a CHI 660E electrochemical workstation (CH  
9 Instrument, China) in a three-electrode setup using a platinum plate (Pt, 1cm × 1cm) as  
10 the counter electrode, Ag/AgCl (saturated KCl solution) as the reference electrode, and  
11 FeCoOOH HNCs as the working electrode. All electrochemical measurements were  
12 conducted under ambient conditions. The catalyst inks were prepared by dispersing 2  
13 mg catalyst powder into 350 μL of ethanol and 10 μL of Nafion (5 wt%) and 140 μL  
14 of ultrapure water under ultrasonication for 1 hour, and then dropping 50 μL of the  
15 catalyst inks on carbon paper with 1×1 cm<sup>2</sup> used as the working electrode. The  
16 polarization curves were measured with a scan rate of 5.0 mV s<sup>-1</sup> at ambient conditions.  
17 Before the NRR measurements, the N<sub>2</sub> (99.99%) feeding gas was first purged to  
18 eliminate the potential NO<sub>x</sub> and NH<sub>3</sub> contaminants. The electrolyte was also bubbled  
19 with high-purity N<sub>2</sub>, which was purged for 30 minutes to expel the air. In this study, all  
20 measured potential (vs. Ag/AgCl) were transformed into the potentials vs. the  
21 reversible hydrogen electrode (RHE) via calibration with the following equation: E (vs  
22 RHE) = E (vs Ag/AgCl) + 0.197 + 0.059×pH.

### 1 1.6 Determination of NH<sub>3</sub>.

2 Concentration of produced NH<sub>3</sub> in 0.1 M Na<sub>2</sub>SO<sub>4</sub> was determined by indophenol blue  
3 method. In detail, 4 mL of post-tested solution was removed from the cathodic cell, and  
4 then added to 50 μL of oxidizing solution (sodium hypochlorite (p<sub>Cl</sub> = 4~4.9) and 0.75  
5 M sodium sodium hydroxide), 500 μL of coloring solution (0.4 M sodium salicylate  
6 and 0.32 M sodium hydroxide) and 50 μL of catalyst solution (0.5 g  
7 Na<sub>2</sub>[Fe(CN)<sub>5</sub>NO]·2H<sub>2</sub>O diluted to 50 mL with deionized water). After standing in  
8 darkness at room temperature for 2 hours, the UV-Vis absorption spectrum was  
9 measured at a wavelength of 655 nm. The concentration-absorbance curves were  
10 calibrated using standard NH<sub>4</sub>Cl solution with a series of concentrations (0.0, 0.1, 0.2,  
11 0.3, 0.4, 0.5 μg mL<sup>-1</sup> in 0.1 M Na<sub>2</sub>SO<sub>4</sub> solution). The standard curve (Y = 0.4497X +  
12 0.0278, R<sup>2</sup> = 0.9999) showed good linear relation of absorbance value with NH<sub>3</sub>  
13 concentration in 0.1 M Na<sub>2</sub>SO<sub>4</sub> in three independent calibrations.

### 14 1.7 Determination of N<sub>2</sub>H<sub>4</sub>.

15 The N<sub>2</sub>H<sub>4</sub> presented in the electrolyte was estimated by the Watt and Chrisp method.  
16 A mixture solution of C<sub>9</sub>H<sub>11</sub>NO (2g), concentrated HCl (10 mL) and ethanol (100 mL)  
17 was used as a color reagent. Specifically, 5 mL of electrolyte from the cathodic chamber  
18 after 2 hours of electrochemical test was added to 5 mL of the as-prepared color reagent  
19 and stirred for 15 minutes at room temperature. Then, the UV-Vis absorption spectrum  
20 was measured at a wavelength of 455 nm. The concentration-absorbance curves were  
21 calibrated using standard N<sub>2</sub>H<sub>4</sub>·H<sub>2</sub>O solution with a series of N<sub>2</sub>H<sub>4</sub> concentrations (0.0,  
22 0.1, 0.2, 0.3, 0.4, 0.5 μg mL<sup>-1</sup> in 0.1 M Na<sub>2</sub>SO<sub>4</sub> solution). The standard curve (Y=0.7083



1  $X + 0.0216$ ,  $R^2=0.9999$ ) showed good linear relationship of absorbance value with  
2  $N_2H_4$  concentration in 0.1 M  $Na_2SO_4$ , as confirmed by three independent calibrations.

### 3 **1.8 Determination of $NO_x$ .**

4  $NO_x$  was determined using N-(1-naphthyl) ethylenediamine dihydrochloride  
5 spectrophotometric methods with some modification. Specifically, 0.5 g sulfanilic acid  
6 was dissolved in 90 mL  $H_2O$  and 5 mL acetic acid. Then, 5 mg N-(1-naphthyl)-  
7 ethylenediamine dihydrochloride was added and the solution was filled to 100 mL to  
8 obtain the chromogenic agent. One milliliter of the treated electrolyte was mixed with  
9 4 mL of the chromogenic agent and left in darkness for 15 minutes. The UV-Vis  
10 absorption spectrum was then measured at 540 nm. The concentration-absorbance  
11 curves were calibrated using standard sodium nitrite solution with a series of  
12 concentrations (0.0, 0.5, 1, 1.5, 2, 2.5  $\mu g mL^{-1}$  in 0.1 M  $Na_2SO_4$  solution). The standard  
13 curve ( $Y = 0.1314 X + 0.005$ ,  $R^2 = 0.9998$ ) shows good linear relation of absorbance  
14 value with  $NO_x$  concentration in 0.1 M  $Na_2SO_4$ , as determined by three independent  
15 calibrations.

### 16 **1.9 $^{15}N$ isotopic labeling experiment.**

17 Before NRR measurements,  $^{15}N_2$  was pre-purified, and the electrolyte was also  
18 bubbled with high-purity  $^{15}N_2$ , which is purged for 30 minutes to expel the air. After  
19 electrolysis for 2 hours, all the electrolyte (50 ml) in cathode chamber was removed,  
20 and its pH was adjusted to 3-4 by adding concentrated  $H_2SO_4$  solution. The solution  
21 was then evaporated under low vacuum at 30 °C until it became 1 mL. Next 250  $\mu L$  of  
22 electrolyte was mixed with 150  $\mu L$  of  $D_2O$ , 50  $\mu L$  of 3.5  $mg mL^{-1}$  MA solution and 50

1  $\mu\text{L}$  of 0.05 M  $\text{H}_2\text{SO}_4$  to obtain 0.5 mL. The produced ammonia was quantified using  $^1\text{H}$   
2 nuclear magnetic resonance (NMR) measurements. Maleic acid (MA) was used for  
3 quantitative analysis.

#### 4 **1.10 Calculations of $\text{NH}_3$ yield rate and Faradaic efficiency.**

5 The equation of  $\text{NH}_3$  yield rate is:

$$6 \quad R = \frac{C \times V}{m \times t}$$

7 The equation of Faradaic efficiency is:

$$8 \quad FE = \frac{3F \times C \times V}{17 \times Q} \times 10^{-6} \times 100\%$$

9 In these equations, **R** ( $\mu\text{g h}^{-1} \text{mg}^{-1} \text{cat}$ ) is the  $\text{NH}_3$  yield, **C** ( $\mu\text{g mL}^{-1}$ ) is the measured  
10  $\text{NH}_3$  concentration, **V** (mL) is the volume of the electrolyte (in our work 50 mL), **F**  
11 ( $96485.34 \text{ C mol}^{-1}$ ) is the Faradaic constant, **m** (mg) was the loading mass of the  
12 catalysts, **t** (h) is the reaction time, **Q** (C) is the total charge during the NRR.

13

14

15

16

17

18

19

20

21

22

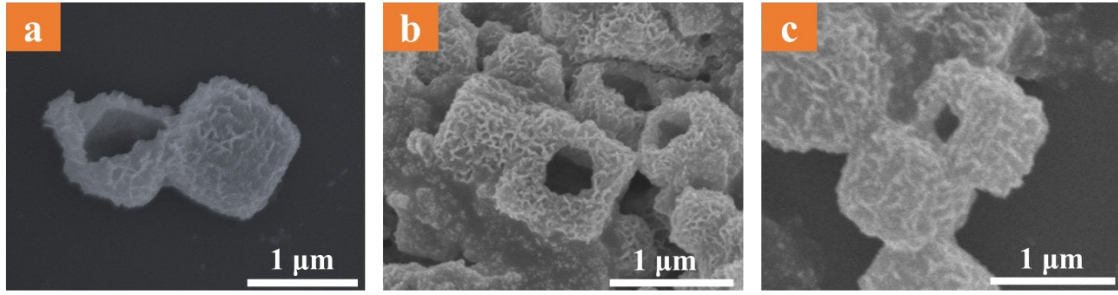

1

2 **Figure S1.** The SEM image of (a) FeCoOOH HNCs, (b) FeCoOOH HNCs-L, and (c)

3 FeCoOOH HNCs-H.

4

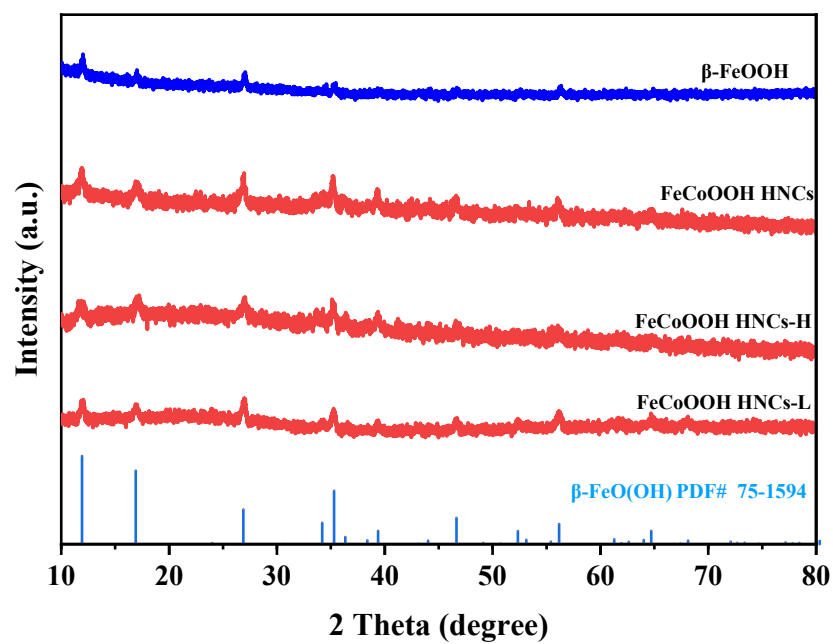

1

2 **Figure S2.** PXRD patterns of the  $\beta$ -FeOOH, FeCoOOH HNCs, FeCoOOH HNCs-H,  
3 and FeCoOOH HNCs-L samples.

4

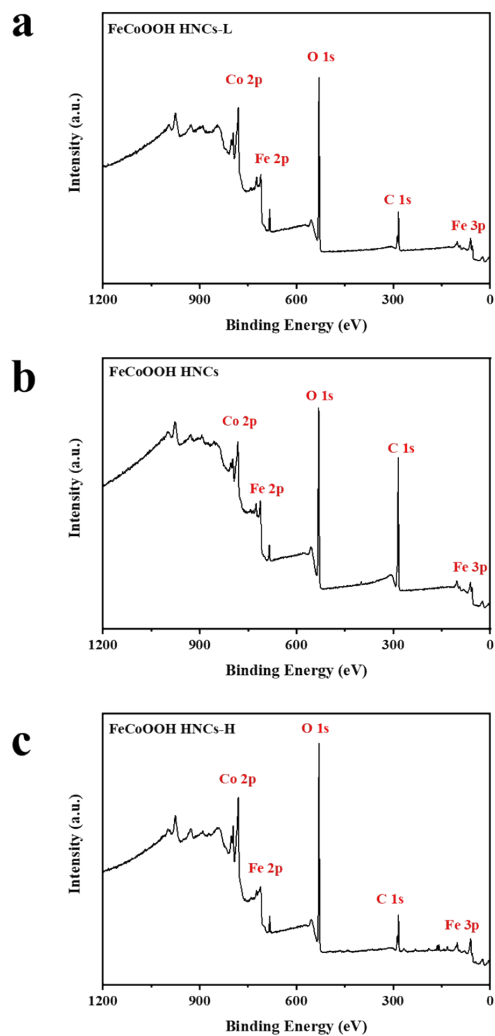

1

2 **Figure S3.** Wide XPS survey spectrum for (a) FeCoOOH HNCs-L, (b) FeCoOOH

3 HNCs, and (c) FeCoOOH HNCs-H.

4

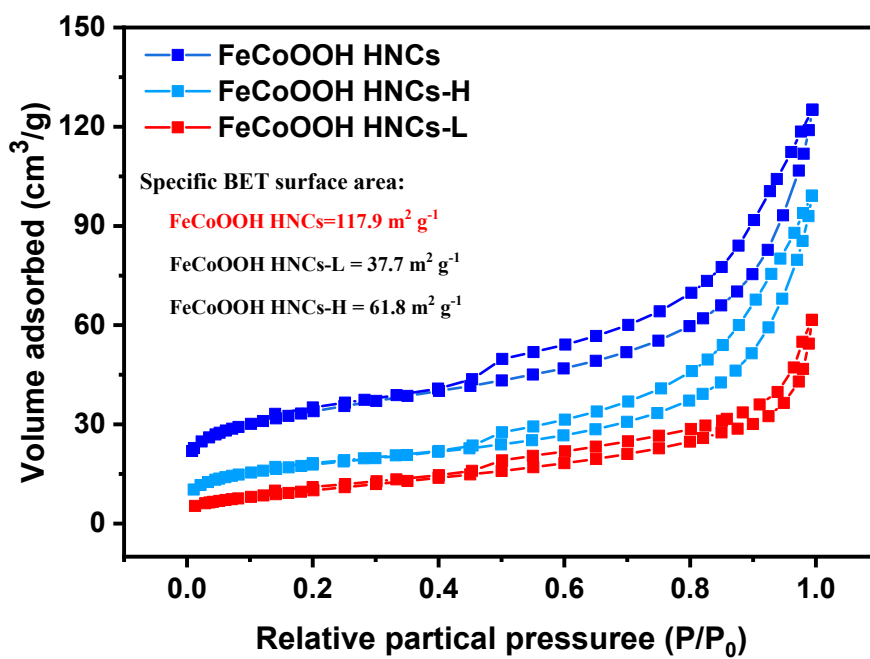

1

2 **Figure S4.** N<sub>2</sub> adsorption-desorption isotherms of the FeCoOOH HNCs, FeCoOOH

3 HNCs-H, and FeCoOOH HNCs-L at 77 K.

4

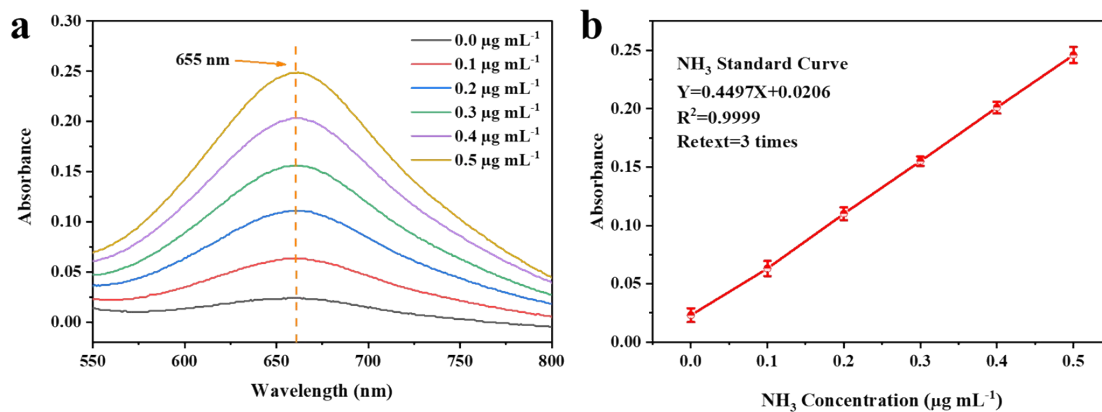

1

2 **Figure S5.** (a) UV-Vis absorption spectra of indophenol assays with  $\text{NH}_3$  in  $0.1 \text{ M}$   
 3  $\text{Na}_2\text{SO}_4$  after standing in darkness for 2 h at room temperature; (b) Calibration curve  
 4 used for calculation of  $\text{NH}_3$  concentration.

5

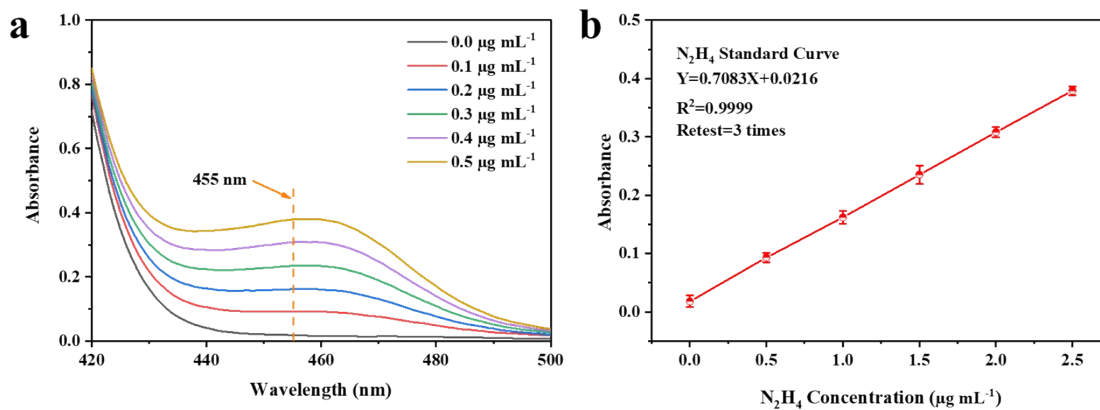

1

2 **Figure S6.** (a) UV-Vis absorption spectra of various  $\text{N}_2\text{H}_4 \cdot \text{H}_2\text{O}$  concentrations after  
 3 incubation for 15 min at room temperature; (b) Calibration curve used for calculation  
 4 of  $\text{N}_2\text{H}_4$  concentration.

5



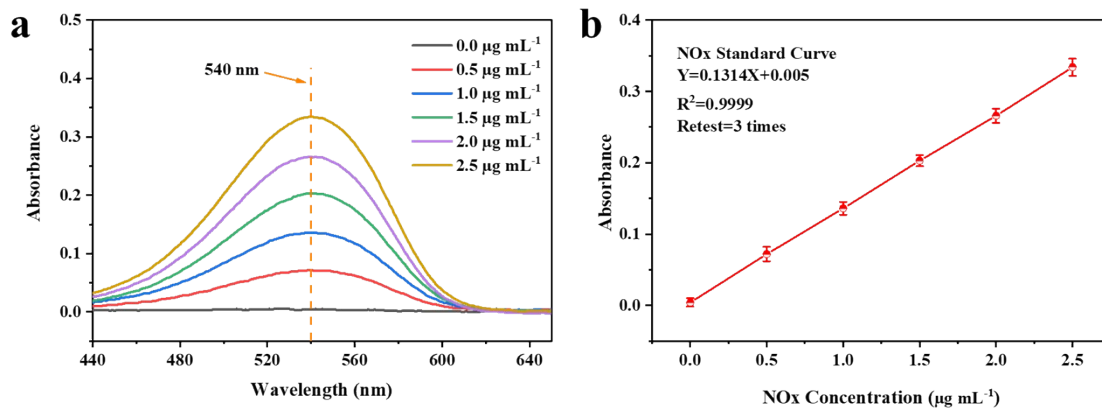

1

2 **Figure S7.** (a) UV-Vis absorption spectra of various  $\text{NO}_x$  concentrations after standing  
3 in darkness for 15 min at room temperature; (b) Calibration curve used for calculation  
4 of  $\text{NO}_x$  concentration.

5

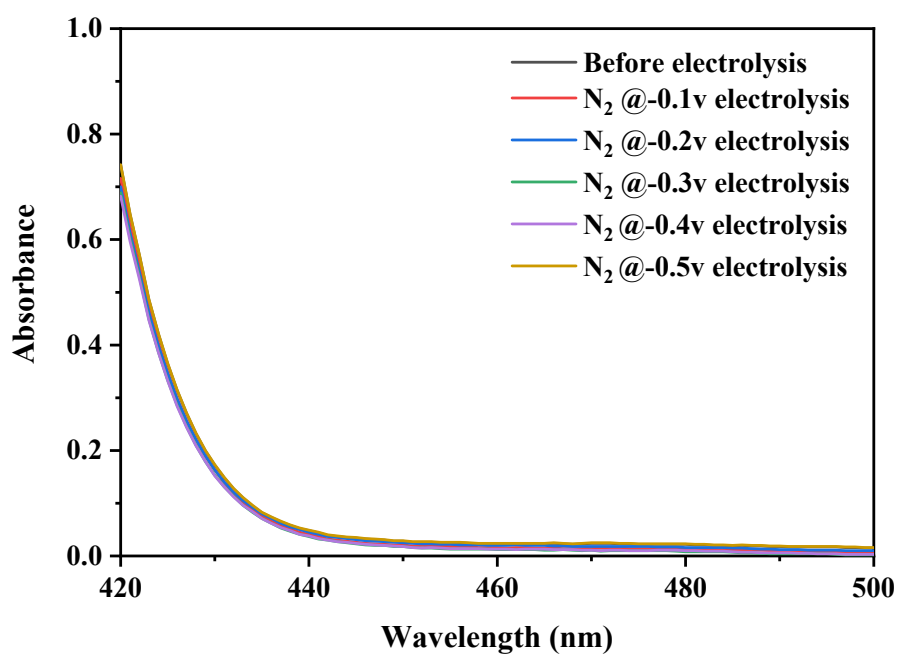

1

2 **Figure S8.** UV-Vis absorption spectra of the electrolytes stained with indicator after  
3 electrolysis at different potentials under N<sub>2</sub> atmosphere for 2 h by using the Watt and  
4 Chrisp method.

5

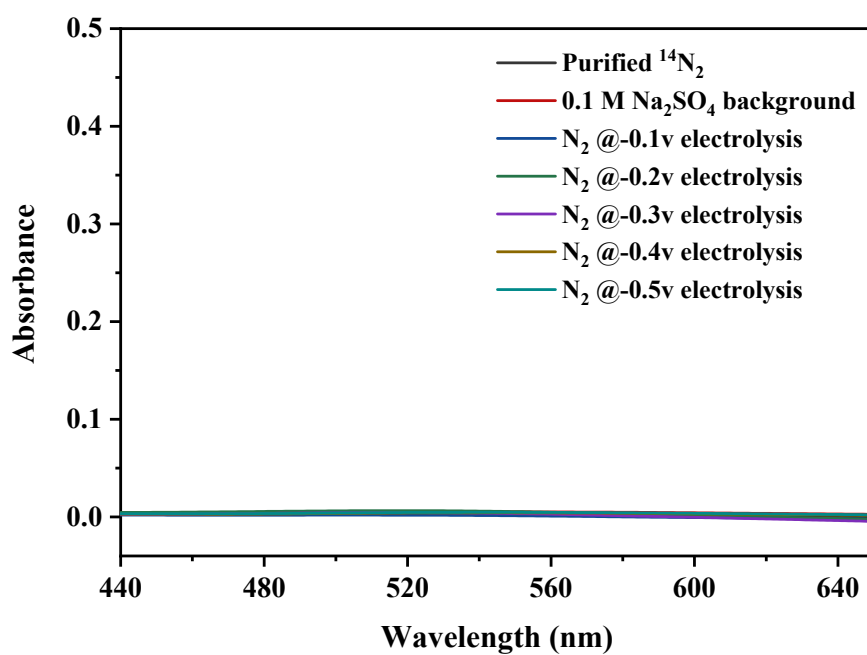

1

2 **Figure S9.** UV-Vis absorption spectra of the electrolytes stained with indicator after  
3 electrolysis at different potentials under N<sub>2</sub> atmosphere for 2 h by using N-(-1-naphthyl)  
4 ethylenediamine dihydrochloride spectrophotometric method.

5

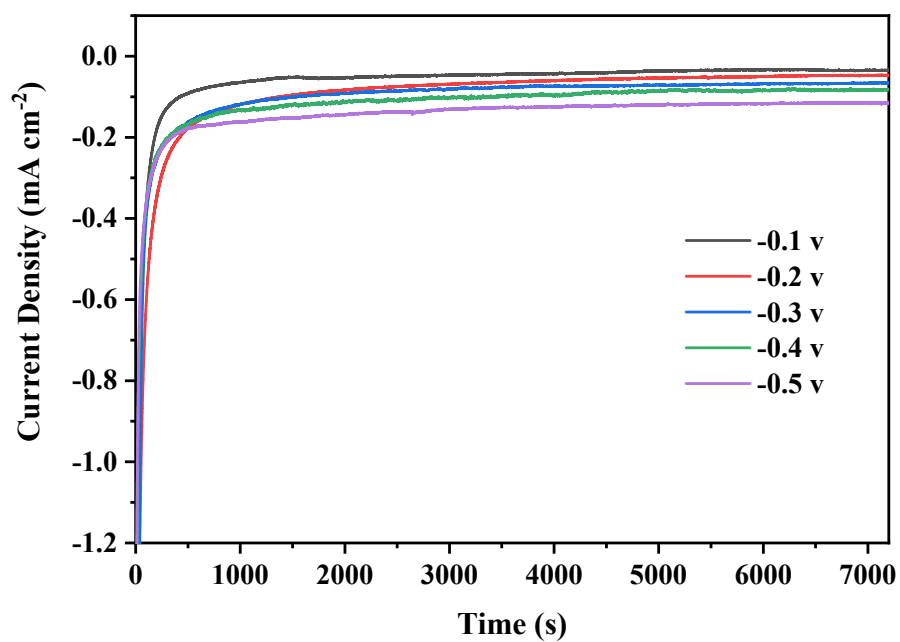

1

2 **Figure S10.** Chronoamperometry results for the FeCoOOH HNCs at different

3 potentials for 2 h.

4

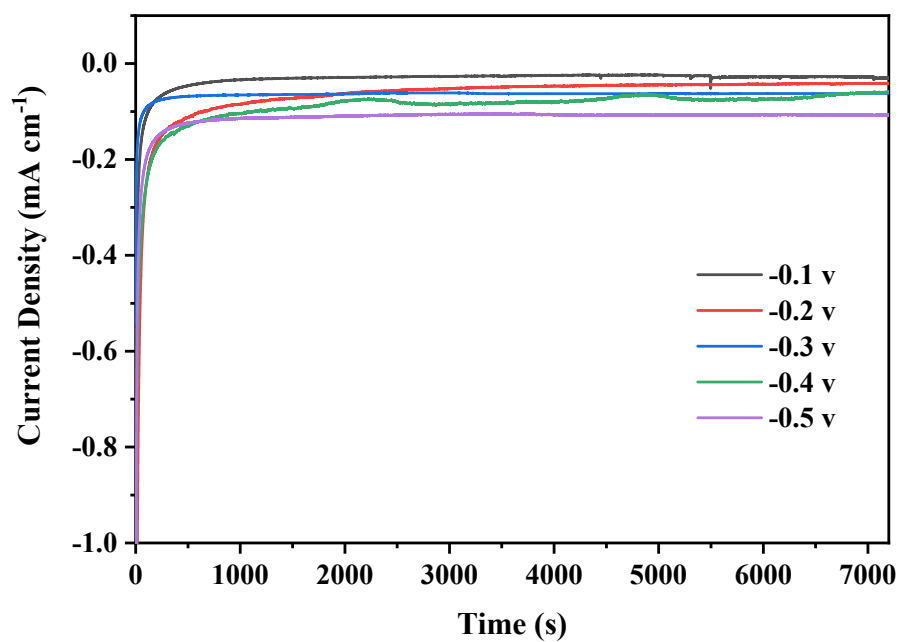

1

2 **Figure S11.** Chronoamperometry results for the FeCoOOH HNCs-H at different

3 potentials for 2 h.

4

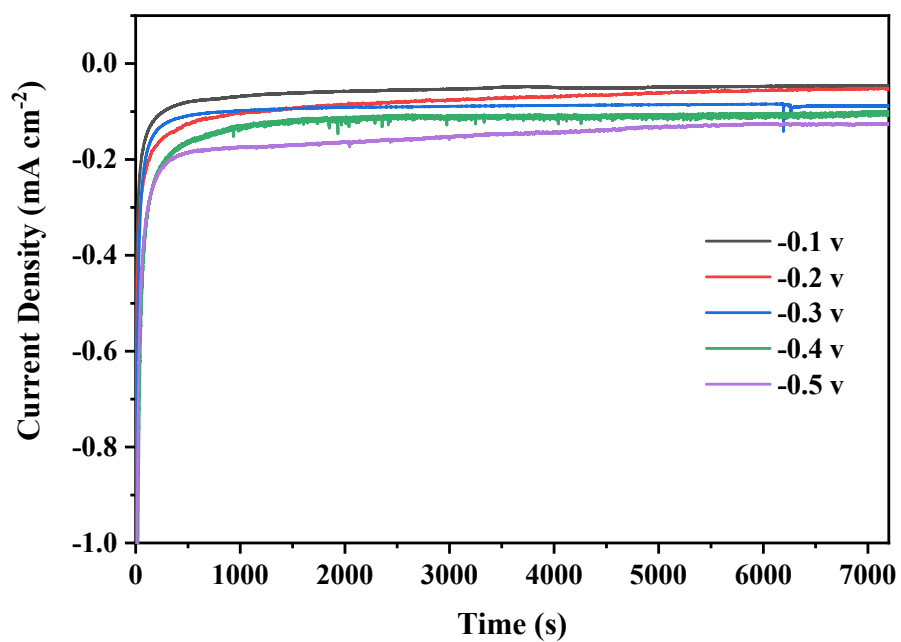

1

2 **Figure S12.** Chronoamperometry results for the FeCoOOH HNCs-L at different

3 potentials for 2 h.

4

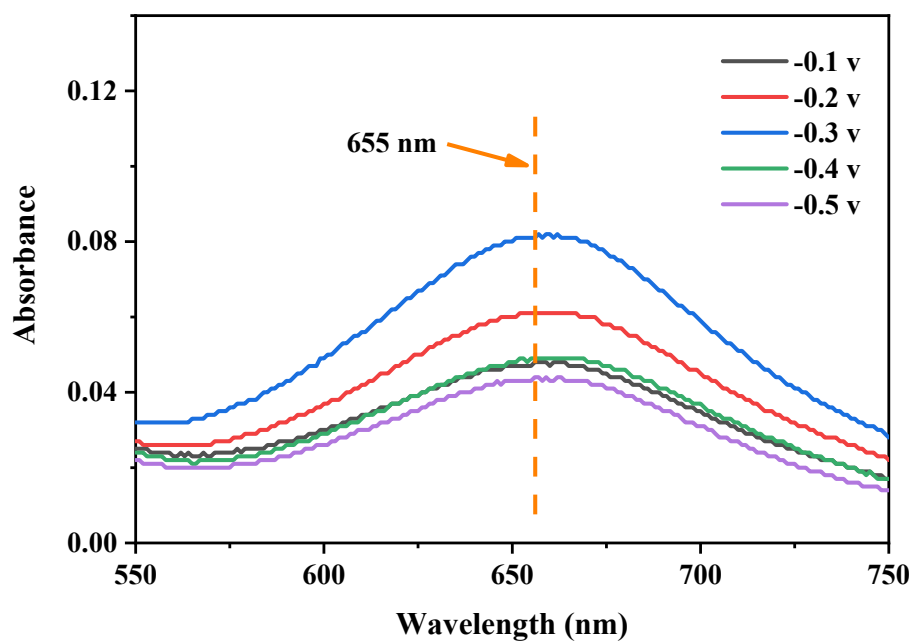

1

2 **Figure S13.** UV-Vis absorption spectra of the electrolytes stained with indophenol

3 indicator after NRR electrolysis by FeCoOOH HNCs catalyst at different potentials for

4 2 h.

5

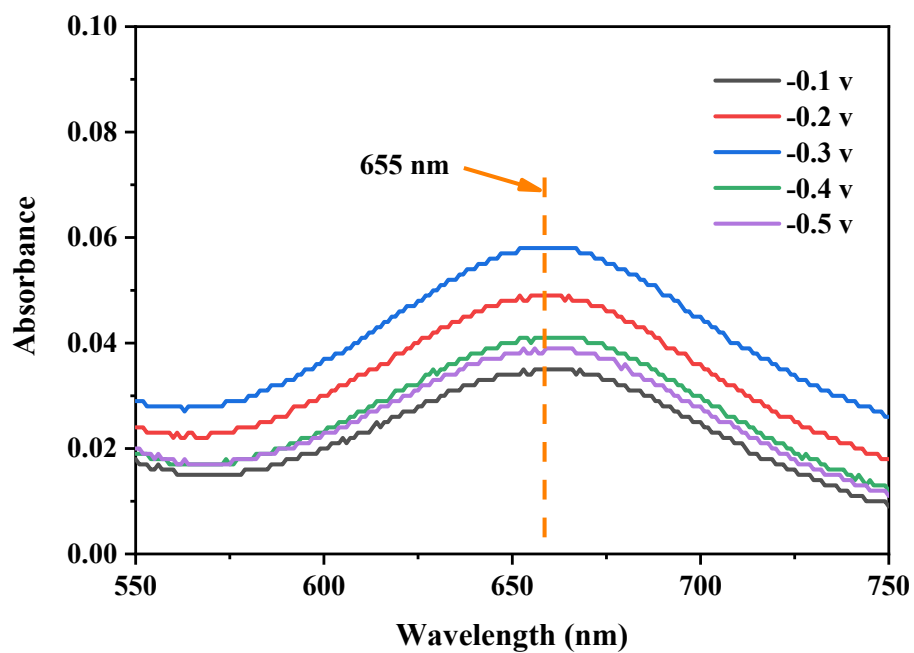

1

2 **Figure S14.** UV-Vis absorption spectra of the electrolytes stained with indophenol

3 indicator after NRR electrolysis by FeCoOOH HNCs-H catalyst at different potentials

4 for 2 h.

5



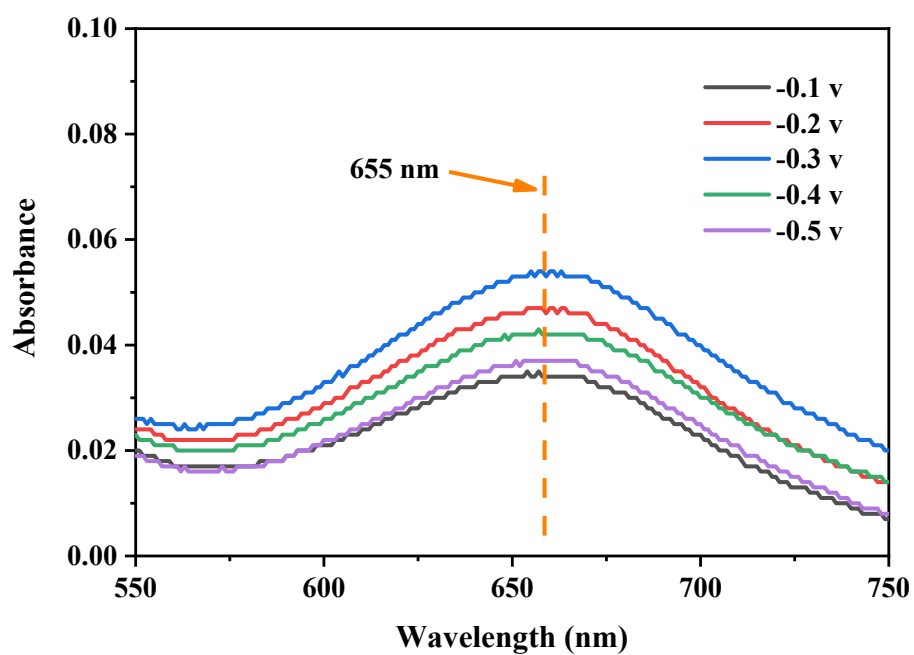

1

2 **Figure S15.** UV-Vis absorption spectra of the electrolytes stained with indophenol

3 indicator after NRR electrolysis by FeCoOOH HNCs-L catalyst at different potentials

4 for 2 h.

5

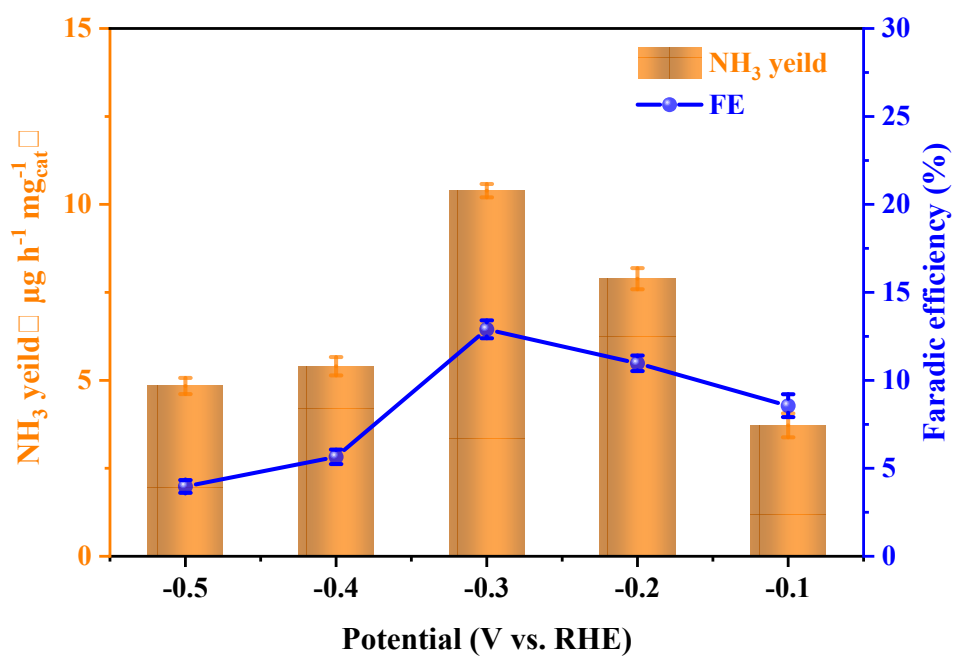

1

2 **Figure S16.** NH<sub>3</sub> yield rate and FE for FeCoOOH HNCs-H catalyst at different

3 potentials for 2 h NRR measurement.

4

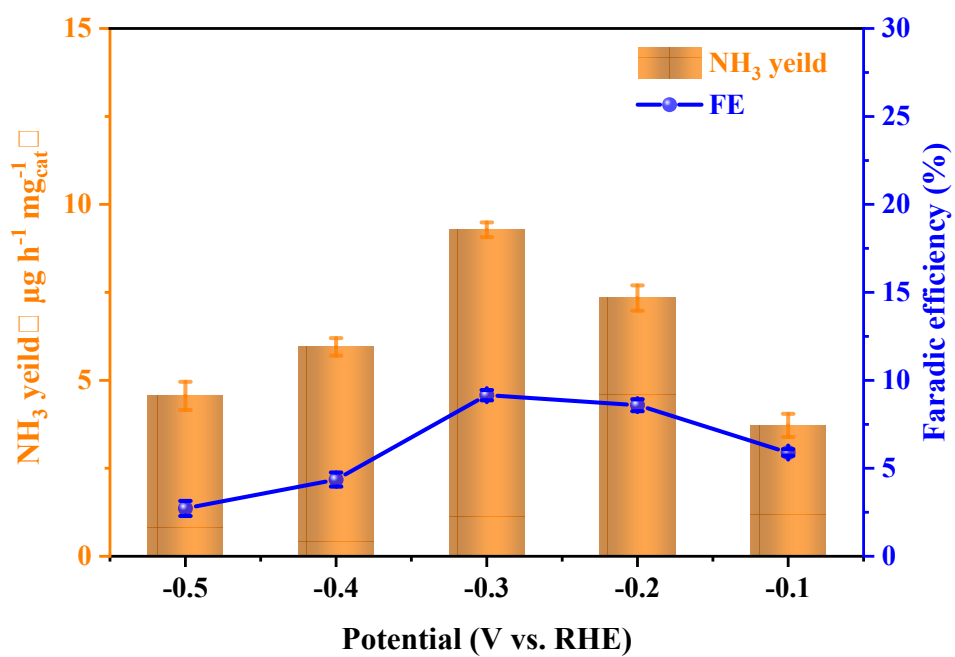

1

2 **Figure S17.** NH<sub>3</sub> yield rate and FE for FeCoOOH HNCs-L catalyst at different

3 potentials for 2 h NRR measurement.

4

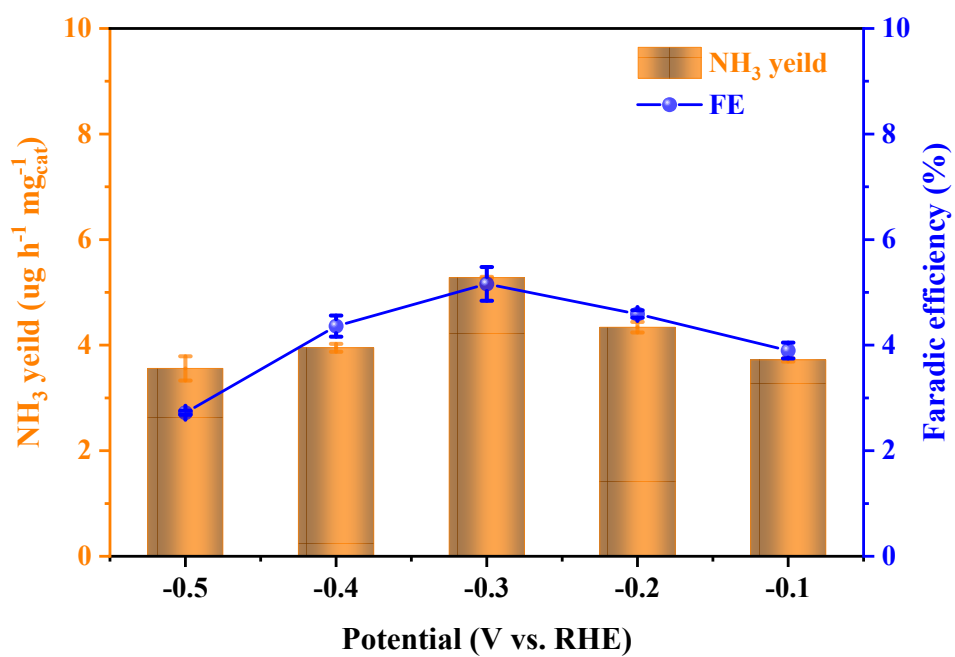

1

2 **Figure S18.** NH<sub>3</sub> yield rate and FE for  $\beta$ -FeOOH catalyst at different potentials for 2 h

3 NRR measurement.

4

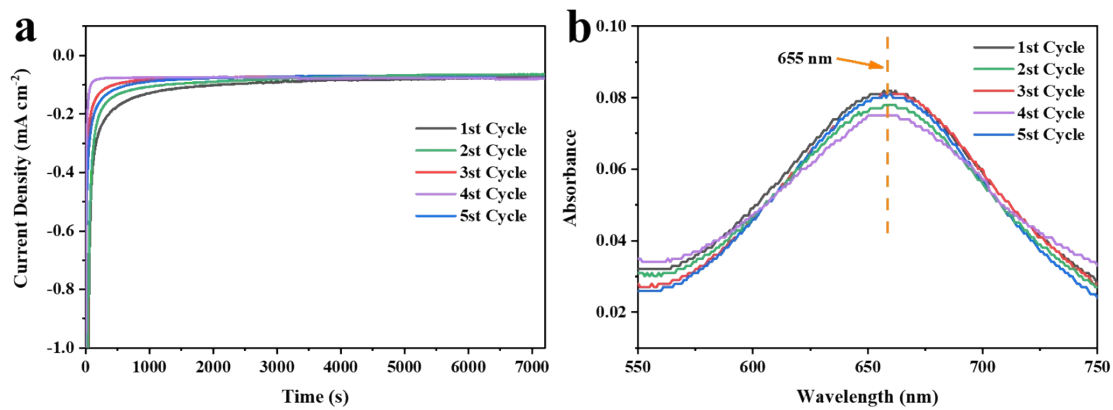

1

2 **Figure S19.** (a) The chronoamperometry assessment and (b) the UV-Vis absorption  
3 spectra of FeCoOOH HNCs catalyst electrolyzed at -0.3 V for 5 cycles.

4

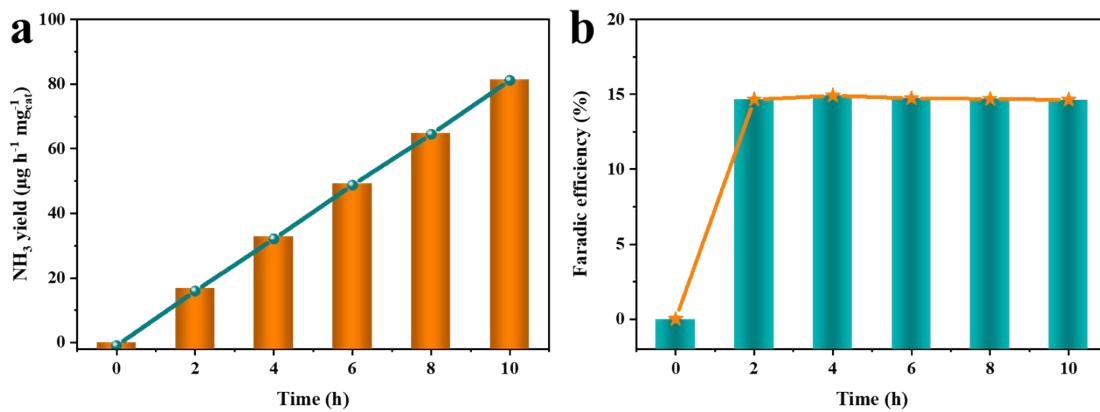

1

2 **Figure S20.** (a) The quantity of  $\text{NH}_3$  with various electrolysis times and (b)  $\text{NH}_3$  FE at

3 various electrolysis times using FeCoOOH HNCs at -0.3 V.

4

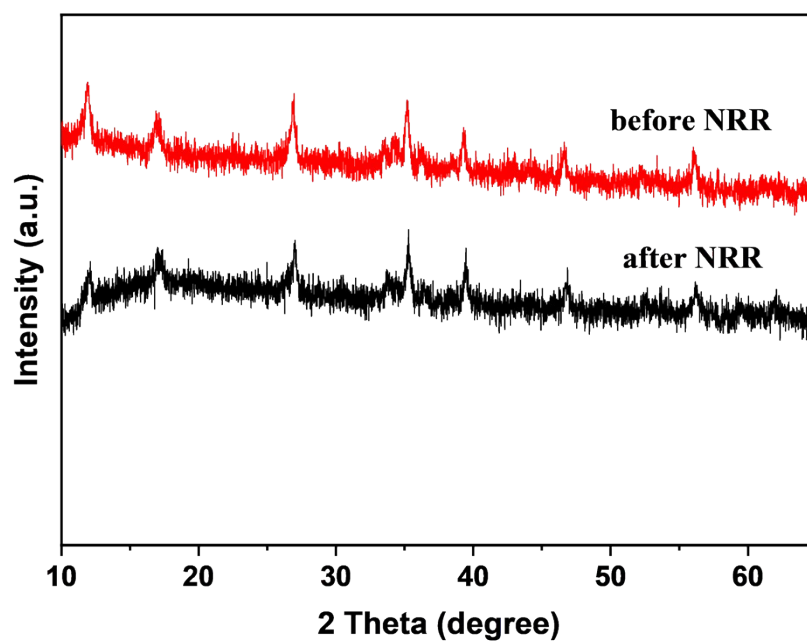

1

2 **Figure S21.** XRD patterns of FeCoOOH HNCs catalyst after long-term NRR test.

3

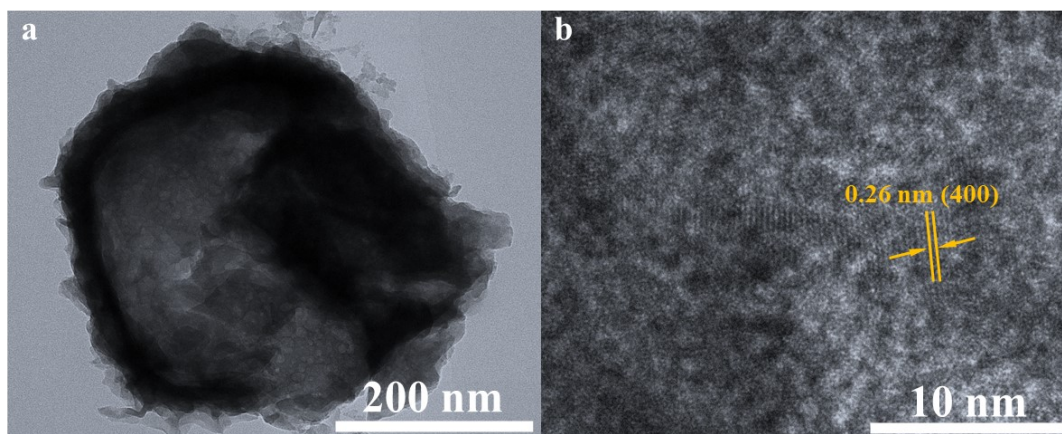

1

2 **Figure S22.** TEM image of FeCoOOH HNCs catalyst after long-term NRR test.

3



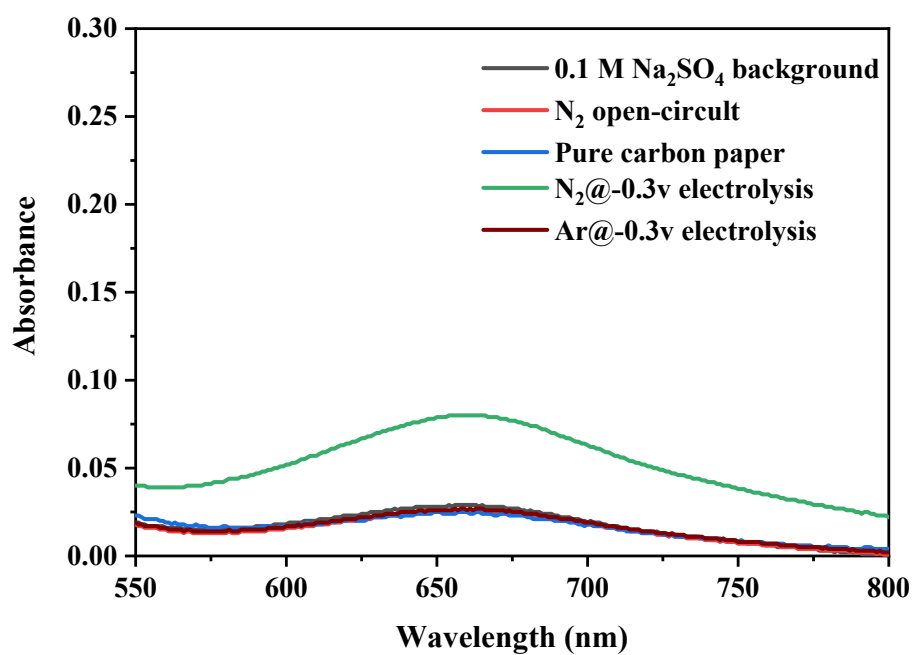

1

2 **Figure S23.** UV-vis absorption spectra of different samples in control experiments to

3 eliminate possible environmental influences.

4

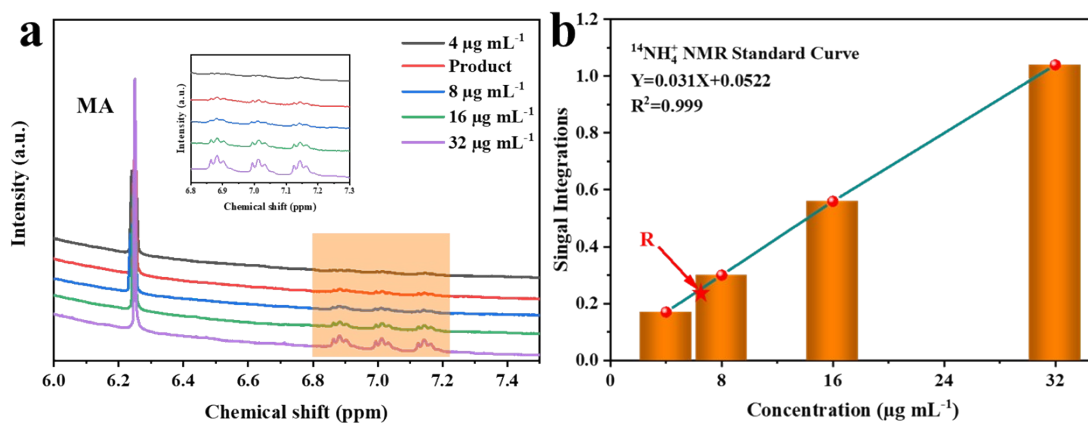

1

2 **Figure S24.** (a) The  $^1\text{H}$  NMR (400 MHz) spectra of a series of  $^{14}\text{NH}_4^+$  standard  
 3 solutions with known concentrations and the FeCoOOH HNCs catalyst produced  
 4  $^{14}\text{NH}_4^+$ . Maleic acid (MA) is used as the internal standard; (b) the corresponding  
 5 calibration curve is used for the calculation of  $\text{NH}_4^+$  concentration.

6 The experiment contained several steps, including the preparation of standard  
 7 solutions and the measurement of  $\text{NH}_3$  concentrations produced by FeCoOOH HNCs  
 8 catalyst. First,  $(^{14}\text{NH}_4)_2\text{SO}_4$  solution was used to prepare different concentrations (8,  
 9 16, 32, 64  $\mu\text{g mL}^{-1}$ ) of  $^{14}\text{NH}_4^+$  standard solutions using 0.1 M  $\text{Na}_2\text{SO}_4$  as the solvent.  
 10 Next, a 3.5  $\text{mg mL}^{-1}$  MA solution was prepared using  $\text{D}_2\text{O}$  as the solvent. In the third  
 11 step, 250  $\mu\text{L}$  of  $^{14}\text{NH}_4^+$  standard solution was mixed with 150  $\mu\text{L}$  of  $\text{D}_2\text{O}$ , 50  $\mu\text{L}$  of MA  
 12 solution, and 50  $\mu\text{L}$  of 0.05 M  $\text{H}_2\text{SO}_4$  to obtain different concentrations (4, 8, 16, and  
 13 32  $\mu\text{g mL}^{-1}$ ) of  $^{14}\text{NH}_4^+$  standard solution for  $^1\text{H}$  NMR measurement. After 2 h of  
 14 electrocatalysis, 50 mL of the cathode's electrolyte was combined with 50  $\mu\text{L}$  of 0.05  
 15 M  $\text{H}_2\text{SO}_4$  to prevent the loss of  $^{14}\text{NH}_4^+$ . The remaining electrolyte was then spun into  
 16 the rotary evaporator and reduced to 1 mL. Next, 250  $\mu\text{L}$  of electrolyte was mixed with  
 17 150  $\mu\text{L}$  of  $\text{D}_2\text{O}$ , 50  $\mu\text{L}$  of MA solution, and 50  $\mu\text{L}$  of 0.05 M  $\text{H}_2\text{SO}_4$  to obtain the product  
 18 of  $\text{NH}_3$  as  $\text{R}(\text{NH}_3)$ . The fifth step involved performing  $^1\text{H}$  NMR measurement on Bruker

1 NMR 400 MHz with 500 scans. The integral areas of MA in the series of  $^{14}\text{NH}_4^+$   
2 standard solutions were normalized to 1.00 to obtain the integral areas of  $^{14}\text{NH}_4^+$   
3 standard solutions and  $\text{R}(\text{NH}_3)$ , which were 0.17, 0.3, 0.56, 1.04, and 0.25. A calibration  
4 curve was plotted using normalized  $^{14}\text{NH}_4^+$  integral area versus concentration.  
5 According to the calibration curve, the  $\text{NH}_3$  concentration produced by FeCoOOH  
6 HNCs catalyst was  $6.38 \mu\text{g mL}^{-1}$  for 1 mL electrolyte after enrichment program.  
7 Therefore,  $6.38 \mu\text{g NH}_3$  was produced in the original electrolyte for 2 h catalysis  
8 reaction. Considering the catalyst's loading mass was 0.2 mg, the  $\text{NH}_3$  yield rate was  
9 calculated to be  $16.0 \mu\text{g}\cdot\text{h}^{-1}\cdot\text{mg}_{\text{cat}}^{-1}$ , which was consistent with the result determined  
10 by the indophenol blue method.  
11

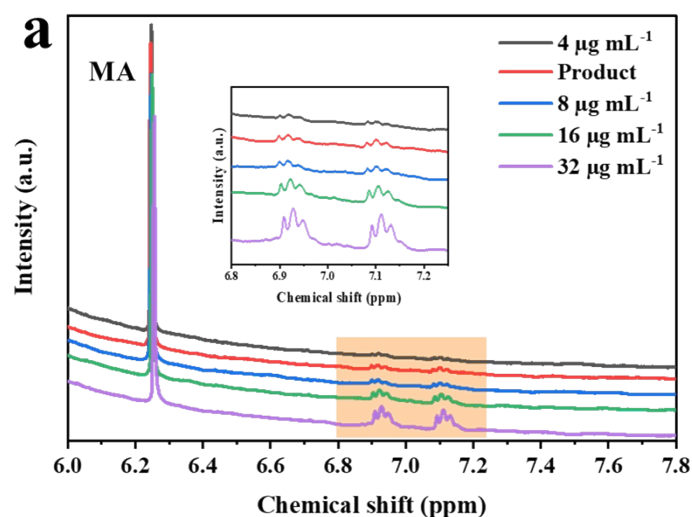

1

2 **Figure S25.** (a) The  $^1\text{H}$  NMR (400 MHz) spectra of a series of  $^{15}\text{NH}_4^+$  standard  
 3 solutions with known concentrations and the FeCoOOH HNCs catalyst produced  
 4  $^{15}\text{NH}_4^+$ . Maleic acid (MA) is used as the internal stand; (b) The corresponding  
 5 calibration curve is used for the calculation of  $\text{NH}_4^+$  concentration.

6 The specific steps of the experiment are the same as **Figure S24** but using  
 7  $(^{15}\text{NH}_4)_2\text{SO}_4$  solution and  $^{15}\text{N}_2$ . The obtained integral areas of  $^{15}\text{NH}_4^+$  standard solutions  
 8 and  $\text{R}(\text{NH}_3)$  were 0.09, 0.19, 0.45, 0.92 and 0.16. According to the calibration curve,  
 9 the concentration of  $\text{NH}_3$  produced by FeCoOOH HNCs catalyst was  $6.57 \mu\text{g mL}^{-1}$  for  
 10 1 mL electrolyte after enrichment program. Then  $6.57 \mu\text{g NH}_3$  was produced in 50 mL  
 11 original electrolyte for 2 h catalysis reaction. Considering the loading mass of catalyst  
 12 is 0.2 mg, so the  $\text{NH}_3$  yield rate was calculated to be  $16.4 \mu\text{g}\cdot\text{h}^{-1}\cdot\text{mg}^{-1}$  cat, which agreed  
 13 with the result determined by the indophenol blue method and  $^1\text{H}$  NMR measurements  
 14 for  $^{14}\text{NH}_4^+$ .

15

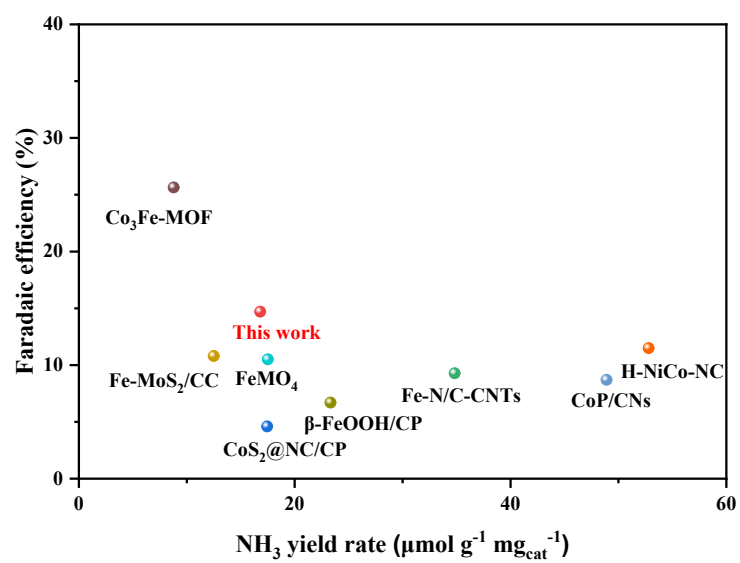

1

2 **Figure S26.** NH<sub>3</sub> yield rate and FE of FeCoOOH HNCs in comparison with reported

3 NRR electrocatalysts;

4

5

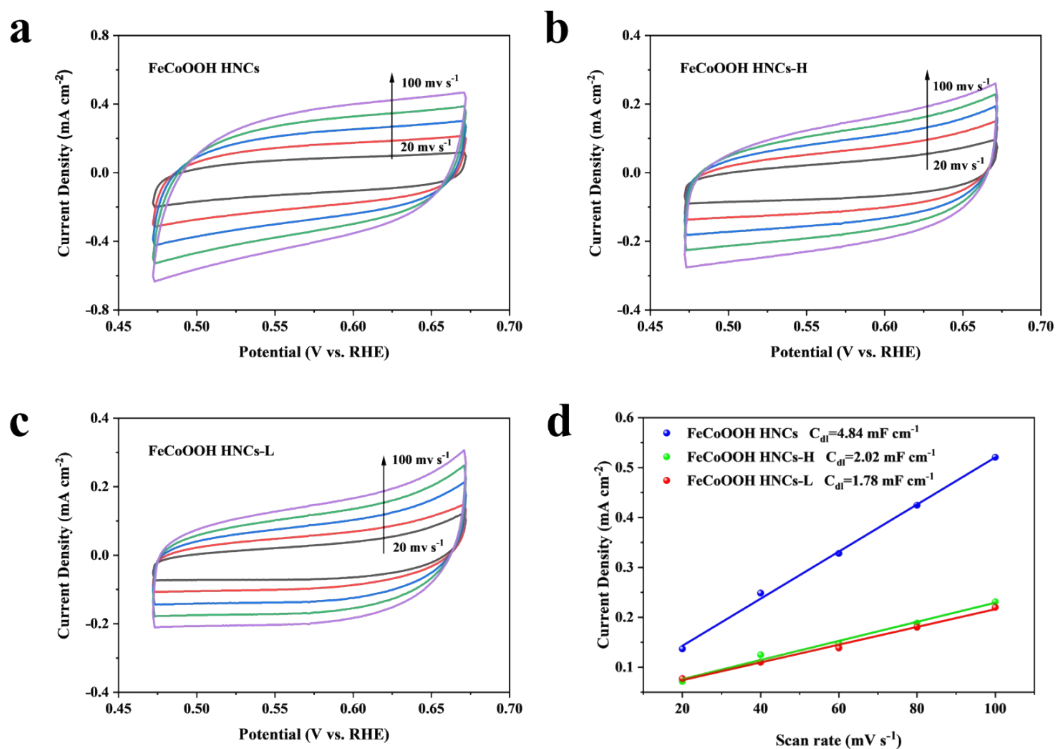

1

2 **Figure S27.** (a-c) Cyclic voltammetry curves of Fe<sub>x</sub>Co<sub>x</sub>OOH HNCs (1:1, 1:2, and 2:1)

3 at various scan rates (20 mV s<sup>-1</sup> to 100 mV s<sup>-1</sup>); (d) Current density vs scan rate of as-

4 prepared samples and the corresponding linear slopes.

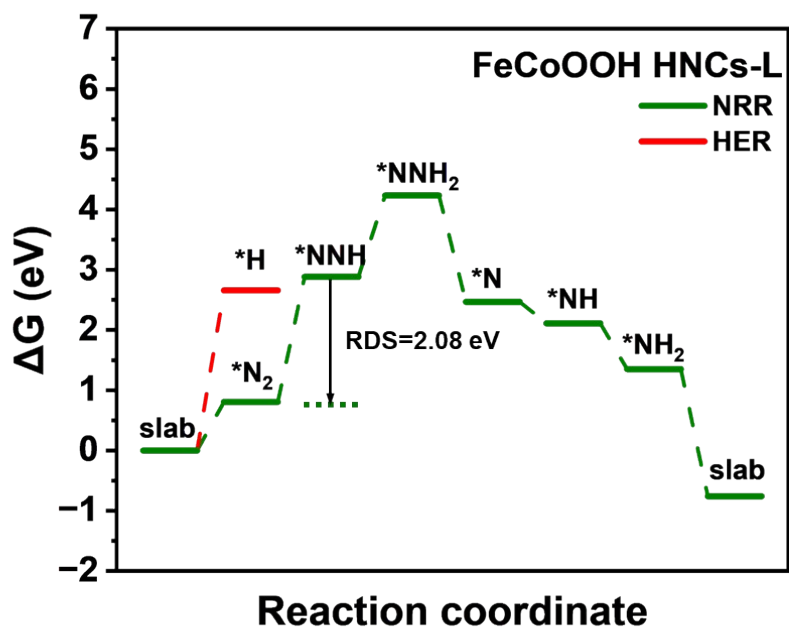

1

2 **Figure S28.** The free energy landscapes and optimized structures of various  
 3 intermediates along the reaction path on FeCoOOH HNCs-L reaction units.

4

5

6

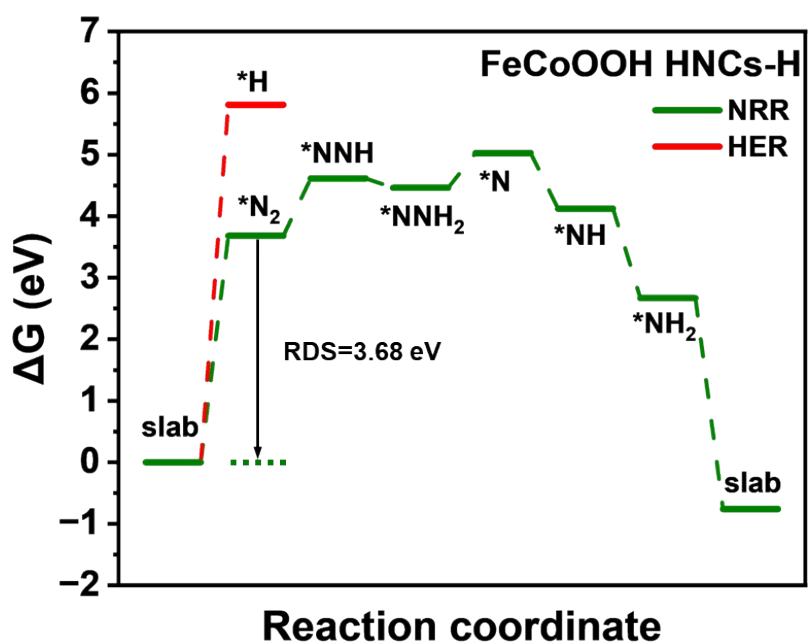

1

2 **Figure S29.** The free energy landscapes and optimized structures of various  
 3 intermediates along the reaction path on FeCoOOH HNCs-H reaction units.



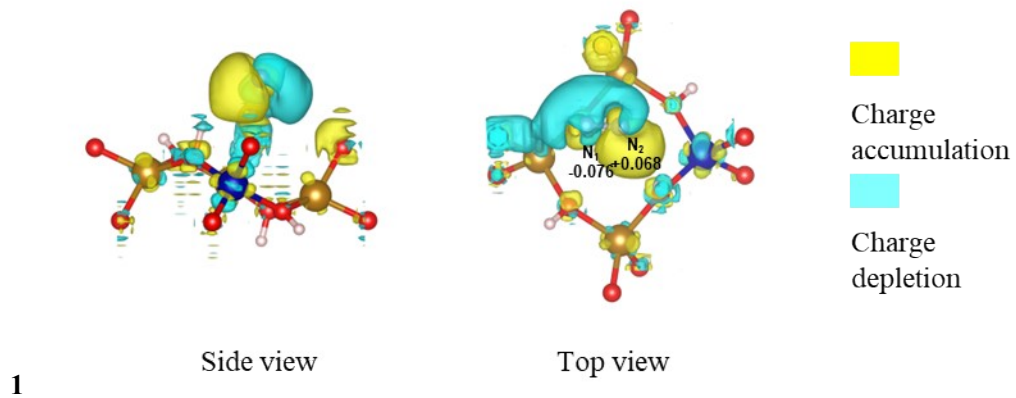

2 **Figure S30.** Charge density difference image of  $*N_2$  adsorbed on FeCoOOH HNCs-L

3 surface.

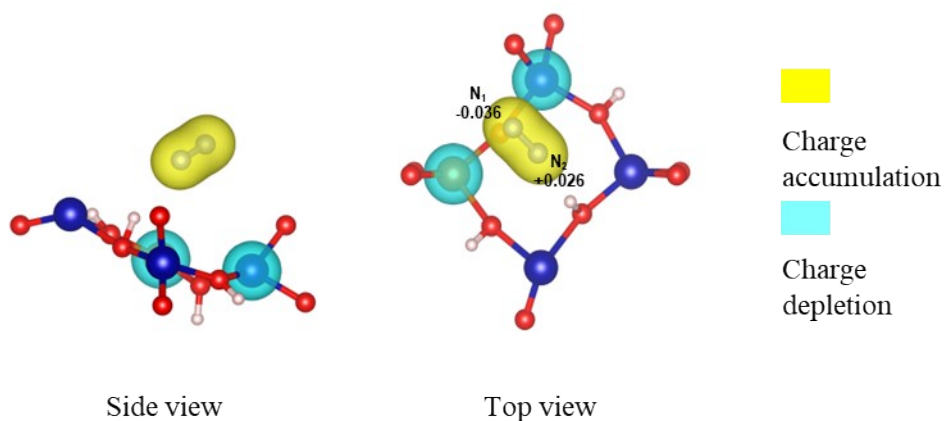

1

2 **Figure S31.** Charge density difference image of  $*N_2$  adsorbed on FeCoOOH HNCs-H

3 surface.

4

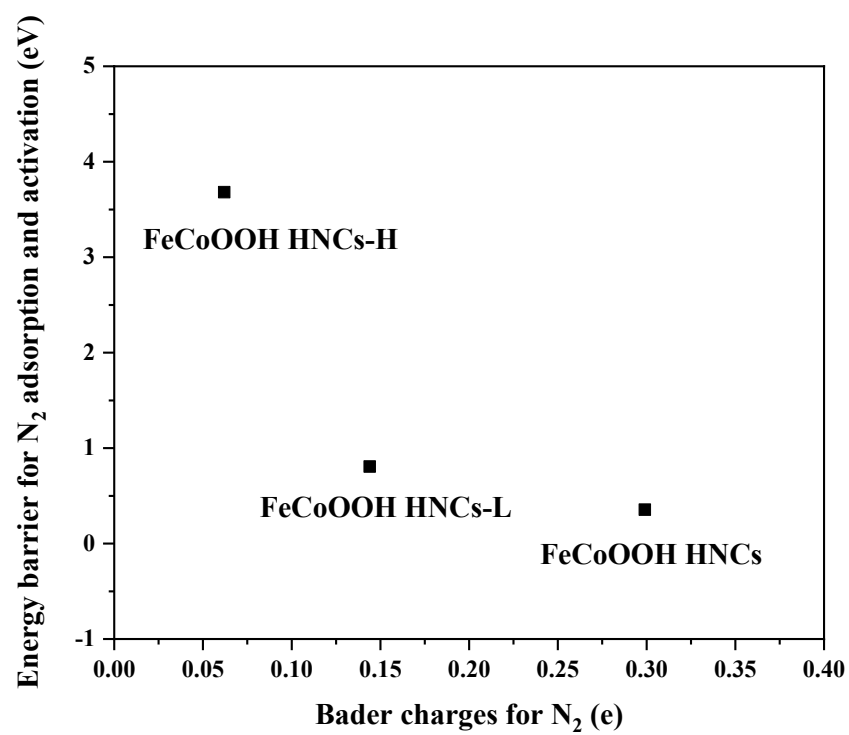

1

2 **Figure S32.** Bader charges for N<sub>2</sub> of FeCoOOH HNCs-L, FeCoOOH HNCs and

3 FeCoOOH HNCs-H.

4

5

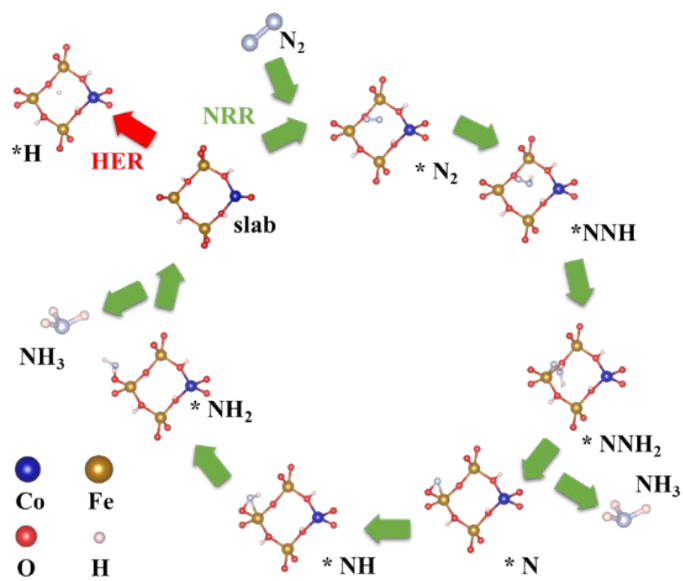

1

2 **Figure S33.** The free energy landscapes and optimized structures of various  
 3 intermediates along the reaction path on FeCoOOH HNCs-L.

4

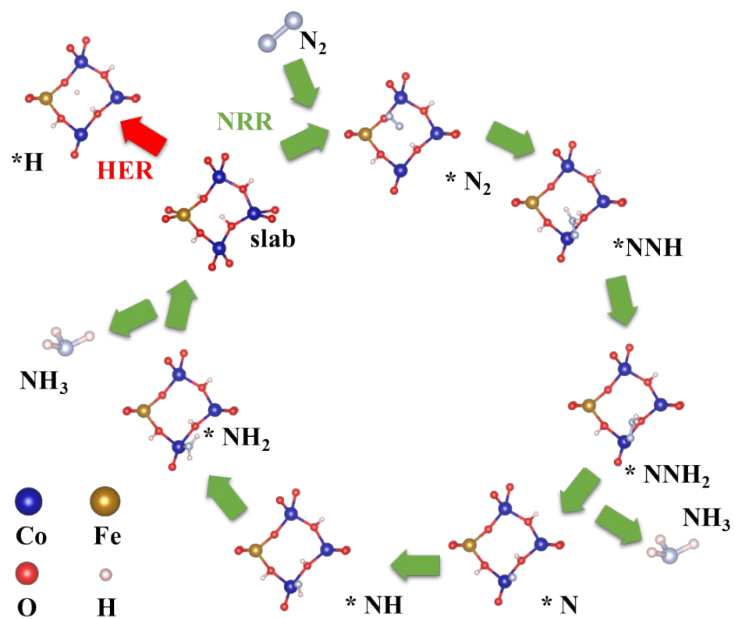

1

2 **Figure S34.** The free energy landscapes and optimized structures of various  
 3 intermediates along the reaction path on FeCoOOH HNCs-H.

4

1

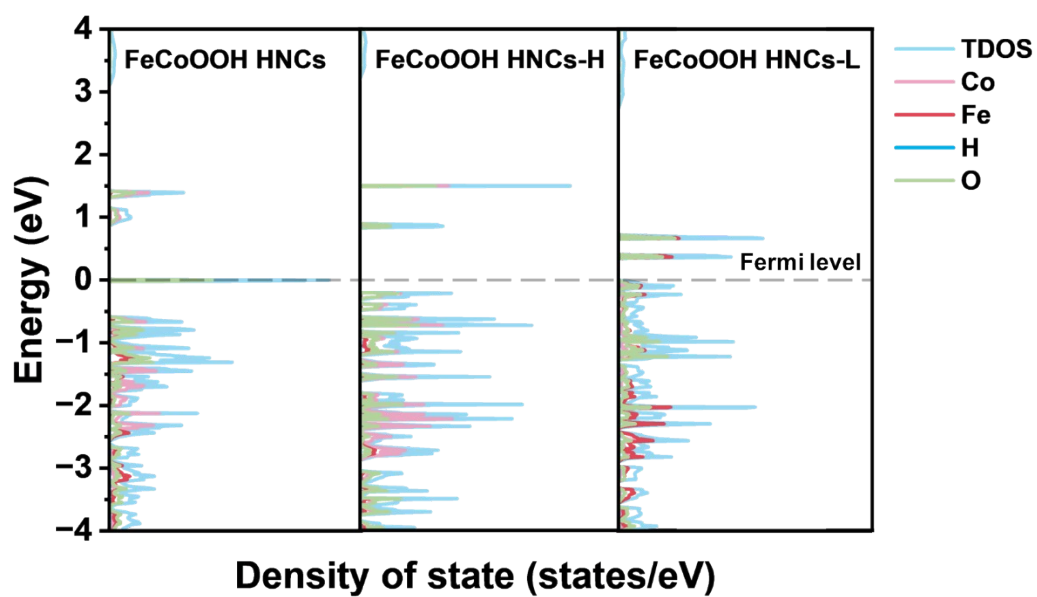

2

3 **Figure S35.** PDOS of the three reaction sites; the Fermi level is set as the energy zero

4 point.

5

6

### 1 3. Tables

2 Table S1. ICP results of the FeCoOOH HNCs

| Catalysts      | Fe/Co (mol%) |
|----------------|--------------|
| FeCoOOH HNCs   | 1:1.11       |
| FeCoOOH HNCs-H | 1:2.14       |
| FeCoOOH HNCs-L | 1.94:1       |

3

4

5

6

7

8

9

10

11

12

13

14

15

16

17

18

19

1 Table S2. The comparable table of state-of-the-art NRR catalysts.

| Catalyst                        | System                                | NH <sub>3</sub> yield rate                                  | FE (%) | References |
|---------------------------------|---------------------------------------|-------------------------------------------------------------|--------|------------|
| FeCoOOH HNCs                    | 0.1 M Na <sub>2</sub> SO <sub>4</sub> | 16.8 μg h <sup>-1</sup> mg <sup>-1</sup> cat (0.2 mg)       | 14.7   | This work  |
| CoS <sub>2</sub> @NC/CP         | 0.1 M HCl                             | 17.45 μg h <sup>-1</sup> mg <sup>-1</sup> cat (0.1 mg)      | 4.6    | 1          |
| Fe-N/C-CNTs                     | 0.1 M KOH                             | 34.83 μg h <sup>-1</sup> mg <sup>-1</sup> cat (0.1mg)       | 9.28   | 2          |
| Co-FePS <sub>3</sub> nanosheets | 0.1 M KOH                             | 90.6 μg h <sup>-1</sup> mg <sup>-1</sup> cat (0.04 mg)      | 3.38   | 3          |
| Fe-MoS <sub>2</sub> /CC         | 0.1 M KOH                             | 12.5 μg h <sup>-1</sup> cm <sup>-2</sup>                    | 10.8   | 4          |
| FeMO <sub>4</sub>               | 0.1 M Na <sub>2</sub> SO <sub>4</sub> | 17.51 μg h <sup>-1</sup> mg <sup>-1</sup> cat (0.38 mg)     | 10.5   | 5          |
| CoVP@NiFeV                      | 0.05 M H <sub>2</sub> SO <sub>4</sub> | 1.6 × 10 <sup>-6</sup> mol h <sup>-1</sup> cm <sup>-2</sup> | 13.8   | 6          |
| Co <sub>3</sub> Fe-MOF          | 1.0 M KOH                             | 8.79 μg h <sup>-1</sup> mg <sup>-1</sup> cat                | 25.64  | 7          |
| β-FeOOH/CP                      | 0.5 M LiClO <sub>4</sub>              | 23.32 μg h <sup>-1</sup> mg <sup>-1</sup> cat               | 6.7    | 8          |
| H-NiCo-NC                       | 0.1 M Na <sub>2</sub> SO <sub>4</sub> | 52.8 μg h <sup>-1</sup> mg <sup>-1</sup> cat                | 11.5   | 9          |
| CoP/CNs                         | 0.1 M Na <sub>2</sub> SO <sub>4</sub> | 48.9 μg h <sup>-1</sup> mg <sup>-1</sup> cat                | 8.7    | 10         |



VFe/NC

0.1 M KOH

73.44  $\mu\text{g h}^{-1} \text{mg}^{-1} \text{cat}$

43

11

---

1

## 1 References

- 2 1 P. Wei, H. Xie, X. Zhu, R. Zhao, L. Ji, X. Tong, Y. Luo, G. Cui, Z. Wang and X.  
3 Sun, *ACS Sustain. Chem. Eng.*, 2020, **8**, 29–33.
- 4 2 Y. Wang, X. Cui, J. Zhao, G. Jia, L. Gu, Q. Zhang, L. Meng, Z. Shi, L. Zheng, C.  
5 Wang, Z. Zhang and W. Zheng, *ACS Catal.*, 2019, **9**, 336–344.
- 6 3 H. Huang, F. Li, Q. Xue, Y. Zhang, S. Yin and Y. Chen, *Small*, 2019, **15**,  
7 1903500.
- 8 4 X. Zhao, X. Zhang, Z. Xue, W. Chen, Z. Zhou and T. Mu, *J. Mater. Chem. A*,  
9 2019, **7**, 27417–27422.
- 10 5 J. Wu, Z. X. Wang, S. Li, S. Niu, Y. Zhang, J. Hu, J. Zhao, P. Xu and P. Xu,  
11 *Chem. Commun.*, 2020, **56**, 6834–6837.
- 12 6 M. Arif, G. Yasin, L. Luo, W. Ye, M. A. Mushtaq, X. Fang, X. Xiang, S. Ji and D.  
13 Yan, *Appl. Catal. B Environ.*, 2020, **265**, 118559.
- 14 7 W. Li, W. Fang, C. Wu, K. N. Dinh, H. Ren, L. Zhao, C. Liu and Q. Yan, *J. Mater.*  
15 *Chem. A*, 2020, **8**, 3658–3666.
- 16 8 X. Zhu, Z. Liu, Q. Liu, Y. Luo, X. Shi, A. M. Asiri, Y. Wu and X. Sun, *Chem.*  
17 *Commun.*, 2018, **54**, 11332–11335.
- 18 9 Z. Zou, L. Wu, F. Yang, C. Cao, Q. Meng, J. Luo, W. Zhou, Z. Tong, J. Chen, S.  
19 Chen, S. Zhou, J. Wang and S. Deng, *ChemSusChem*, 2022, **15**, e202200127.
- 20 10 S. Zhang, W. Gong, Y. Lv, H. Wang, M. Han, G. Wang, T. Shi and H. Zhang,  
21 *Chem. Commun.*, 2019, **55**, 12376–12379.
- 22 11 Y. Wang, J. Wang, H. Li, Y. Li, J. Li, K. Wei, F. Peng and F. Gao, *Small Struct.*,  
23 2023, **4**, 2200306.
